# Supplementary material for: Effects of Dietary Fibers on Short-Chain Fatty Acids and Gut Microbiota Composition in Healthy Adults: A Systematic Review
Source: MDPI journal article supplement (doi:10.3390/nu14132559), 2022-06-21
Supplement: s1 [file s1]

|                            | (1) random sequence generation | (2) allocation concealment | (3) blinding of participants and personnel | (4) blinding of outcome assessment | (5) incomplete outcome data | (6) selective reporting data | (7) other bias |
|----------------------------|--------------------------------|----------------------------|--------------------------------------------|------------------------------------|-----------------------------|------------------------------|----------------|
| Brandl et al. 2020         | +                              | +                          | +                                          | ?                                  | -                           | +                            | ?              |
| Reimer et al. 2020         | +                              | +                          | +                                          | +                                  | -                           | ?                            | ?              |
| Boler et al. 2011          | +                              | ?                          | +                                          | +                                  | +                           | +                            | ?              |
| Fernando et al. 2010       | ?                              | ?                          | -                                          | -                                  | +                           | ?                            | ?              |
| Hooda et al. 2012          | ?                              | ?                          | +                                          | +                                  | +                           | +                            | ?              |
| Slavin et al. 2011         | ?                              | ?                          | +                                          | ?                                  | +                           | +                            | ?              |
| Clarke et al. 2016         | +                              | +                          | +                                          | +                                  | ?                           | -                            | ?              |
| Costabile et al. 2010      | ?                              | ?                          | +                                          | +                                  | ?                           | +                            | ?              |
| Darzi et al. 2016          | +                              | +                          | ?                                          | -                                  | ?                           | -                            | ?              |
| Deroover et al. 2017       | +                              | +                          | +                                          | ?                                  | +                           | +                            | ?              |
| Fernandes et al. 2011      | ?                              | ?                          | ?                                          | ?                                  | +                           | +                            | ?              |
| Healey et al. 2018         | +                              | +                          | +                                          | +                                  | +                           | -                            | ?              |
| Holscher et al. 2015       | ?                              | ?                          | +                                          | +                                  | +                           | -                            | ?              |
| Lecerf et al. 2012         | ?                              | ?                          | +                                          | ?                                  | ?                           | -                            | ?              |
| Petry et al. 2012          | ?                              | ?                          | +                                          | ?                                  | +                           | +                            | ?              |
| Chen et al. 2021           | +                              | +                          | +                                          | +                                  | ?                           | +                            | ?              |
| Finegold et al. 2014       | ?                              | ?                          | +                                          | ?                                  | -                           | +                            | ?              |
| Trimigno et al. 2017       | ?                              | ?                          | ?                                          | +                                  | ?                           | -                            | ?              |
| Lefranc-Millot et al. 2012 | -                              | -                          | +                                          | ?                                  | -                           | -                            | ?              |
| Alfa et al. 2018           | +                              | +                          | +                                          | +                                  | -                           | +                            | ?              |
| Deehan et al. 2020         | +                              | +                          | +                                          | +                                  | ?                           | +                            | ?              |
| Zhang et al. 2019          | +                              | +                          | +                                          | +                                  | ?                           | ?                            | ?              |
| Boll et al. 2016           | ?                              | ?                          | -                                          | -                                  | -                           | ?                            | ?              |
| Wilms et al. 2021          | +                              | +                          | +                                          | +                                  | -                           | -                            | ?              |
| Costabile et al. 2012      | -                              | -                          | +                                          | +                                  | ?                           | +                            | ?              |
| Lamichhane et al. 2014     | -                              | -                          | +                                          | +                                  | +                           | +                            | ?              |
| Sloan et al. 2018          | ?                              | ?                          | +                                          | +                                  | ?                           | +                            | ?              |
| Windey et al. 2014         | +                              | +                          | +                                          | ?                                  | ?                           | +                            | ?              |
| François et al. 2012       | +                              | +                          | +                                          | +                                  | ?                           | ?                            | ?              |
| Müller et al. 2020         | +                              | +                          | +                                          | ?                                  | -                           | +                            | ?              |
| Elison et al. 2016         | +                              | +                          | +                                          | ?                                  | ?                           | -                            | ?              |
| Fechner et al. 2014        | +                              | +                          | +                                          | +                                  | +                           | +                            | ?              |
| Damen et al. 2012          | ?                              | ?                          | +                                          | ?                                  | +                           | +                            | ?              |
| Walton et al. 2012         | ?                              | ?                          | +                                          | ?                                  | -                           | ?                            | ?              |
| Ampatzoglou et al. 2015    | -                              | -                          | -                                          | ?                                  | +                           | +                            | ?              |
| Ross et al. 2013           | ?                              | ?                          | -                                          | ?                                  | +                           | +                            | ?              |
| Vanegas et al. 2017        | +                              | +                          | -                                          | ?                                  | -                           | -                            | ?              |
| Vuholm et al. 2017         | +                              | +                          | -                                          | ?                                  | -                           | -                            | ?              |
| Carvalho-Wells et al. 2010 | ?                              | ?                          | +                                          | ?                                  | -                           | ?                            | ?              |
| Connolly et al. 2016       | +                              | +                          | +                                          | ?                                  | -                           | +                            | ?              |
| Duysburgh et al. 2021      | ?                              | ?                          | -                                          | ?                                  | ?                           | ?                            | ?              |
| Nilsson et al. 2010        | ?                              | ?                          | -                                          | ?                                  | +                           | +                            | ?              |

Supplementary Figure S1: Risk of bias for each item assessed in each of the included studies

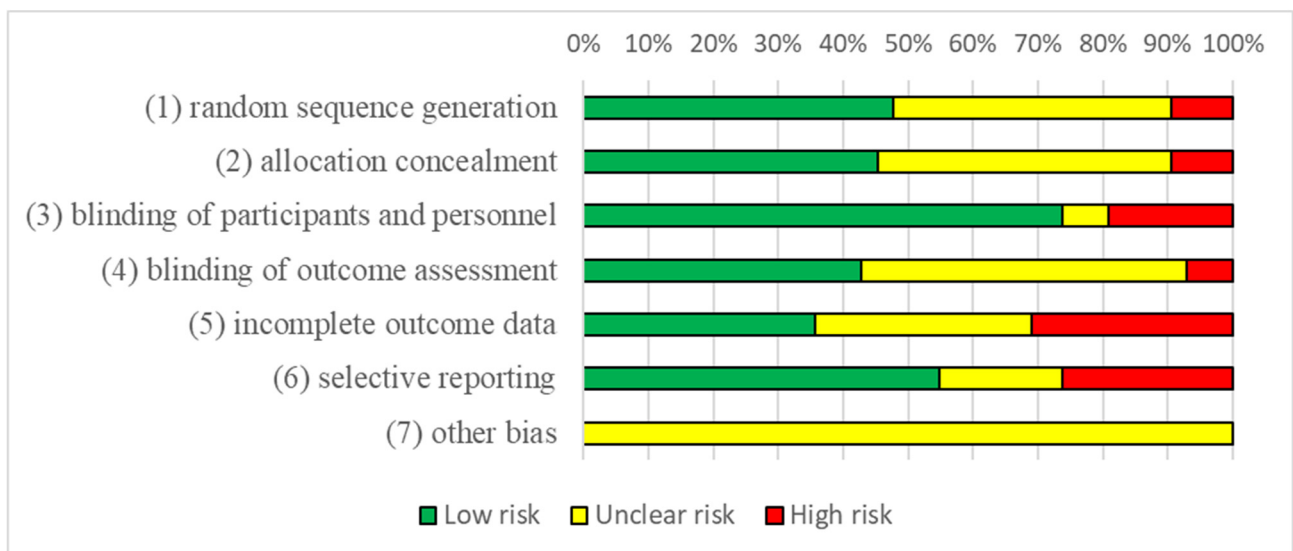

Supplementary Figure S2: Risk of bias for each item assessed, presented as a percentage across all included studies combined
