# Supplementary material for: Effects of Dietary Fibers on Short-Chain Fatty Acids and Gut Microbiota Composition in Healthy Adults: A Systematic Review
Source: MDPI journal article supplement (doi:10.3390/nu14132559), 2022-06-21
Supplement: s1 [file s1]

**Table S3.** Characteristics of the health-related outcomes and their findings.

| Reference | Other Outcomes <sup>d</sup>                                                                                         | Other Findings <sup>d</sup>                                                                                                                                                                                                                                                                                                                                                                                                                      |
|-----------|---------------------------------------------------------------------------------------------------------------------|--------------------------------------------------------------------------------------------------------------------------------------------------------------------------------------------------------------------------------------------------------------------------------------------------------------------------------------------------------------------------------------------------------------------------------------------------|
| [28]      | Tolerance, GI symptoms and stool characteristics                                                                    | No significant changes in overall health, abdominal pain, bloating, flatulence, bowel habits with MSPrebiotic® RS vs. Amioca TF                                                                                                                                                                                                                                                                                                                  |
| [43]      | Biochemical markers, anthropometric characteristics, PB, glucose response, stool characteristics and GI symptoms    | <p>↑ Body weight (<math>p=0.10</math>), BMI (<math>p=0.008</math>) with RG vs. WG</p> <p>↑ Frequency in diarrhea/loose stool with WG vs. RG</p> <p>Negative correlation between total fiber intake and body fat %</p> <p>Positive correlation between 24-h fecal weight and total fiber intake</p>                                                                                                                                               |
| [11]      | Flatulence, distention, reflux, tolerance scores, fecal ammonia, 4-methylphenol and indole                          | <p>↑ Flatulence (<math>p=0.001</math>) and distention (<math>p=0.07</math>) with PDX, soluble maize fiber vs. NFC</p> <p>↓ Fecal ammonia, 4-methylphenol and indole with PDX, soluble maize fiber vs. NFC</p> <p>↓ Fecal pH with soluble maize fiber vs. NFC</p> <p>↑ Fecal wet weight and reflux with soluble maize fiber vs. NFC</p>                                                                                                           |
| [31]      | Glucose, ISI <sub>composite</sub> , NEFA, GLP-1, GLP-2, breath H <sub>2</sub> , subjective appetite and GI symptoms | <p>↓ ISI<sub>composite</sub> with WWB + hiAXOS vs. WWB</p> <p>↓ Dose-dependent in glucose response and fasting insulin with increasing AXOS</p> <p>↑ Dose-dependent in ISI<sub>composite</sub> with increasing AXOS</p> <p>↑ Breath H<sub>2</sub> with AXOS vs. WWB</p> <p>↑ Dose-dependent in breath H<sub>2</sub> with increased AXOS at fasting and during 3 h</p>                                                                            |
| [9]       | Anthropometry and body composition, fecal bulk, stool consistency and frequency                                     | <p>No changes in anthropometric and body composition parameters in PRE (trial 1, trial 2) vs. baseline</p> <p>TRIAL 1:</p> <p>↑ Fecal wet weight with PRE vs. CTRL</p>                                                                                                                                                                                                                                                                           |
| [47]      | Blood lipids, glucose, anthropometric measurements and bowel habits                                                 | No changes in serum lipids, glucose, bowel habits and anthropometric measures according to treatment or in washout                                                                                                                                                                                                                                                                                                                               |
| [24]      | Bowel habit, stool consistency, GI tolerance symptoms, chemistry profile, metabolic panel and vitals                | <p>↑ Gene abundance of <math>\alpha</math>-L-rhamnosidase, <math>\beta</math>-fructosidase, and levanase, and tricarboxylic acid and vitamin B6 biosynthesis pathways with arabinogalactan vs. MD</p>                                                                                                                                                                                                                                            |
| [15]      | Wellbeing, gut symptomology, circulating immune cell populations and cytokine profiles and blood biochemistry       | <p>↑ GI symptoms with Orafti vs. baseline, MD</p> <p>↑ Indigestion with Orafti vs. baseline, MD</p> <p>↑ Abdominal pain with Orafti vs. baseline, MD</p> <p>↑ Frequency of self-reported adverse GI events with Orafti vs. MD</p> <p>↑ Serum LPS with Orafti vs. baseline, MD</p> <p>↑ % of CD282+/TLR2+ myeloid dendritic cells with Orafti vs. MD</p> <p>↑ T helper 2 IL-4 and GM-CSF with Orafti vs. MD</p> <p>↓ IL-10 with Orafti vs. MD</p> |

|      |                                                                                                                                                        |                                                                                                                                                                                                                                                                                                                                                                     |
|------|--------------------------------------------------------------------------------------------------------------------------------------------------------|---------------------------------------------------------------------------------------------------------------------------------------------------------------------------------------------------------------------------------------------------------------------------------------------------------------------------------------------------------------------|
|      |                                                                                                                                                        | Differences in serum and fecal Ig concentrations with Orafti vs. baseline, MD                                                                                                                                                                                                                                                                                       |
| [48] | TC, HDL, LDL, TAG, glucose, CRP, IL-6, TNF- $\alpha$ , PYY, GLP-1 and insulin concentrations                                                           | Significant time x treatment interaction for TC and LDL<br>↓ TC with WGO after 6 wks vs. baseline<br>↑ TC and LDL with NWG vs. baseline                                                                                                                                                                                                                             |
| [16] | GI symptoms, bowel habits and stool characteristic                                                                                                     | ↑ Mild and moderate bloating with VLCI vs. MD<br>Highly variable stool consistency                                                                                                                                                                                                                                                                                  |
| [33] | Immunological analysis (IgA and PGE <sub>2</sub> ), DNA damage, bowel habits and GI symptoms                                                           | No changes in bowel habits and GI symptoms except for ↑ formed stools with PDX vs. MD<br>↓ Total fecal IgA and genotoxic damage to HT29 DNA with PDX vs. MD                                                                                                                                                                                                         |
| [41] | Urinary phenol and p-cresol excretions, stool frequency and consistency, and adverse GI symptoms                                                       | ↓ Urinary phenol and p-cresol excretions with WR+ vs. WR-<br>↑ Stool frequency with WR+ vs. WR-                                                                                                                                                                                                                                                                     |
| [17] | Postprandial metabolites, insulin sensitivity, glucose, quantitative and qualitative appetite assessment, breath H <sub>2</sub> , NEFA and GI symptoms | ↑ Fasting AUC breath H <sub>2</sub> with IN vs. L-Rha<br>↑ Breath H <sub>2</sub> with IN, L-Rha vs. CTRL<br>↓ iAUC with L-Rha vs. CTRL<br>Significant treatment x time effects for postprandial insulin concentrations<br>Treatment x time interaction following lunch for NEFA<br>↑ GI symptoms with IN vs. CTRL<br>↑ Urge to defecate with L-Rha vs. CTRL (day 7) |
| [29] | GI tolerance and bowel habits                                                                                                                          | ↑ Composite GI scores with maize and tapioca RS4 vs. baseline<br>↑ Bowel movement frequency with potato RS4 at 50 g/d vs. baseline<br>↓ Fecal hardness with potato RS4 at ≥35 g/d vs. baseline                                                                                                                                                                      |
| [18] | Start and duration of fermentation                                                                                                                     | No differences in the start and duration of fermentation with WB fractions vs. CTR                                                                                                                                                                                                                                                                                  |
| [49] | N.A.                                                                                                                                                   | N.A.                                                                                                                                                                                                                                                                                                                                                                |
| [39] | Blood analysis, GI symptoms, safety and tolerance                                                                                                      | Supplementation of 20 g of 2'FL and LNnT was safe and well tolerated: no irregularities in blood analysis<br>↑ Bloating and passing of gas with 20 g of 2'FL and LNnT vs. baseline<br>↑ Rumbling with 20 g dose of 2'FL vs. baseline<br>↑ Harder stools with 20 g LNnT vs. baseline                                                                                 |
| [19] | Glucose, insulin, C-peptide, FFA, breath H <sub>2</sub> and methane concentrations                                                                     | ↑ Breath H <sub>2</sub> and methane responses with IN vs. GLU<br>↑ Breath H <sub>2</sub> and methane AUC with IN vs. GLU<br>↓ FFA rebounded with IN vs. GLU<br>↓ FFA 4 h with IN vs. GLU                                                                                                                                                                            |
| [12] | N.A.                                                                                                                                                   | N.A.                                                                                                                                                                                                                                                                                                                                                                |
| [40] | Anthropometric characteristics, blood lipids and BP                                                                                                    | ↓ Body weight, BMI, fat-free mass, waist circumference, with CF, LF vs. baseline<br>↓ Fecal pH, body fat mass, TC, LDL, total:HDL and LDL:HDL, hs-CRP with LF vs. baseline<br>↓ Systolic BP and fecal dry matter with CF, LF vs. CD<br>↓ Blood lipid markers (except for HDL) with LF vs. CD, CF                                                                    |

|      |                                                                                                                                                  |                                                                                                                                                                                                                                                                                                                                                                                                                                                                                                                                                                                                                                   |
|------|--------------------------------------------------------------------------------------------------------------------------------------------------|-----------------------------------------------------------------------------------------------------------------------------------------------------------------------------------------------------------------------------------------------------------------------------------------------------------------------------------------------------------------------------------------------------------------------------------------------------------------------------------------------------------------------------------------------------------------------------------------------------------------------------------|
|      |                                                                                                                                                  | ↓ TC, HDL-C, LDL-C with CF vs. baseline<br>↑ Daily fecal weight with LF vs. CD<br>↓ OFTT with LF vs. CD<br>↑ Excretion of primary bile acids with LF vs. baseline, CF<br>↓ Excretion of total bile acids and secondary bile acids with CF vs. CD                                                                                                                                                                                                                                                                                                                                                                                  |
| [25] | Tolerance of XOS, GI symptoms and stool characteristics                                                                                          | No changes in stool pH, mass and GI side effects with XOS vs. PLA                                                                                                                                                                                                                                                                                                                                                                                                                                                                                                                                                                 |
| [37] | Emergent adverse events, hematological and clinical chemistry parameters, tolerance and effects on colonic protein and carbohydrate fermentation | ↓ Stool pH, p-cresol and frequency of constipation with WBE at 10 g/day vs. PLA<br>↓ % lymphocytes with WBE at 3 g/day vs. MD<br>↑ Frequency and severity of flatulence with WBE at 10 g/day vs. PLA                                                                                                                                                                                                                                                                                                                                                                                                                              |
| [20] | Appetite ratings and GI symptoms                                                                                                                 | LDF group:<br>No significant changes in appetite rating with Orafti vs. baseline<br><br>HDF group:<br>↑ Frequency of moderate GI symptoms (flatulence) with Orafti vs. MD<br>↓ Satisfaction before lunch and hunger before dinner with Orafti<br>↑ Fullness and satisfaction after lunch with Orafti                                                                                                                                                                                                                                                                                                                              |
| [21] | GI tolerance, daily stool characteristics and daily food intake                                                                                  | 7.5 g/day of agave IN was well tolerated<br>↓ Fecal 4-methyphenol and fecal pH (not significant) with IN vs. CTRL                                                                                                                                                                                                                                                                                                                                                                                                                                                                                                                 |
| [13] | Fecal protein-based fermentative end-products and fecal pH                                                                                       | ↓ Fecal pH with SCF vs. NFC                                                                                                                                                                                                                                                                                                                                                                                                                                                                                                                                                                                                       |
| [34] | Biogenic amine (dimethyl amine), organic acid (succinate), and amino acid (phenylacetate)                                                        | No changes in any fecal metabolites                                                                                                                                                                                                                                                                                                                                                                                                                                                                                                                                                                                               |
| [22] | Fecal dry matter and pH, p-cresol and phenol, $\alpha$ -glucosidase and $\beta$ -glucuronidase activities, sIgA and tolerance                    | ↑ Digestive tolerance with INU-XOS vs. MD, XOS after 3 wks<br>↑ Flatulence, bloating and daily stool frequency with INU-XOS vs. MD after 3-4 weeks<br>↑ Liquidity perceived of stool with INU-XOS vs. MD after 3 weeks<br>↓ Stool consistency with INU-XOS vs. MD after 3-4 weeks<br>↓ LPS, general wellbeing and professional activities with INU-XOS vs. MD after 4 weeks<br>↓ Fecal pH with XOS vs. MD after 4 weeks<br>↓ p-cresol with XOS vs. MD<br>↑ Bacterial enzymatic activity with XOS, INU-XOS vs. MD after 4 weeks<br>↑ Fecal expression of s-IgA with INU-XOS vs. MD<br>↑ sIgA with INU-XOS vs. MD (not significant) |
| [27] | $\beta$ -glucosidase activity, fecal pH and tolerance                                                                                            | ↑ $\beta$ -glucosidase activity and frequency flatulence (but milder) with NUTRIOSE® at 10 and 15 g/day vs. GLU<br>↓ Fecal pH with NUTRIOSE® at 20 g/day vs. baseline<br>↑ Incidence of abdominal pain with GLU vs. NUTRIOSE® at 10 and 15 g/day                                                                                                                                                                                                                                                                                                                                                                                  |

|      |                                                                                                                                                                                         |                                                                                                                                                                                                                                                                                                                                                                                                                                                                                                                                                                                                        |
|------|-----------------------------------------------------------------------------------------------------------------------------------------------------------------------------------------|--------------------------------------------------------------------------------------------------------------------------------------------------------------------------------------------------------------------------------------------------------------------------------------------------------------------------------------------------------------------------------------------------------------------------------------------------------------------------------------------------------------------------------------------------------------------------------------------------------|
| [38] | WGTT, stool parameters, gut permeability, plasma LBP, fecal calprotectin, plasma IL-6, IL-8, TNF- $\alpha$ , and IL-1 $\beta$ , energy expenditure, substrate metabolism, GLP-1 and PYY | <p>No changes in WGTT, gastric emptying, OCTT, gut permeability, plasma LBP, fecal calprotectin, plasma IL-6, IL-8, TNF-<math>\alpha</math>, and IL-1<math>\beta</math>, energy expenditure, respiratory quotient and carbohydrate oxidation, glucose, insulin, FFA, TAG, glycerol and appetite, hunger, satiety, and fullness ratings with AXOS vs. MD</p> <p>No changes in stool frequency, stool weight, stool moisture and fasting H<sub>2</sub> with AXOS vs. baseline</p> <p>↑ Bristol stool scale with AXOS vs. baseline</p> <p>↓ Postprandial GLP-1 AUC<sub>0-90min</sub> with AXOS vs. MD</p> |
| [50] | Relationship between SCFAs and metabolic test markers                                                                                                                                   |                                                                                                                                                                                                                                                                                                                                                                                                                                                                                                                                                                                                        |
| [23] | Iron status (hemoglobin, PF, and CRP)                                                                                                                                                   | <p>↑ iron absorption with IN vs. MD (not significant)</p> <p>↓ Fecal pH with IN vs. baseline, MD</p>                                                                                                                                                                                                                                                                                                                                                                                                                                                                                                   |
| [10] | GI symptoms, body weight and quality of life                                                                                                                                            | <p>No changes in body weight within or between PRE vs. CTRL in both trials and in GI symptoms with PRE vs. CTRL in both trials</p>                                                                                                                                                                                                                                                                                                                                                                                                                                                                     |
| [44] | Metabolic profiles of plasma, urine, and fecal waters                                                                                                                                   | <p>After 1 week:</p> <p>↑ Nicotinurate in fecal waters with WG vs. RG</p> <p>↓ Urinary carnitine, acetylcarnitine, urea and taurine with WG vs. RG</p> <p>After 2 weeks:</p> <p>↑ Plasma urea with WG vs. RG</p> <p>Men:</p> <p>↓ 4-hydroxyphenylacetate, dimethylamine, trimethylamine and methylguanadine, pyruvate, citrate, succinate, 3-hydroxyisovalerate and N-acetyl-glycoproteins with WG vs. RG</p> <p>↑ creatinine with WG vs. RG</p> <p>Women:</p> <p>↑ fumarate at week 1 with WG vs. RG</p>                                                                                              |
| [14] | Stool weight, intestinal transit time, stool frequency and consistency, selected intestinal enzymes, fecal pH and ammonia                                                               | <p>↓ Ammonia levels and <math>\beta</math>-glucuronidase activity with IN vs. CTRL</p> <p>↑ Flatulence with IN vs. CTRL</p>                                                                                                                                                                                                                                                                                                                                                                                                                                                                            |
| [35] | Urine metabolites, colonic volume                                                                                                                                                       | <p>↑ Colonic volume with OF, MD vs. baseline</p> <p>↑ Fasting breath H<sub>2</sub> with OF vs. MD</p> <p>↓ Aggregate metabolite score for carbohydrates and carbohydrate conjugates with OF, MS vs. baseline</p> <p>No changes in aggregate metabolite scores for amino acids, peptides and analogues and lipids with OF vs. baseline</p>                                                                                                                                                                                                                                                              |
| [26] | Total cholesterol differences                                                                                                                                                           |                                                                                                                                                                                                                                                                                                                                                                                                                                                                                                                                                                                                        |

|      |                                                                                                                                                                                                                                                                                |                                                                                                                                                                                                                                                                                                                                                 |
|------|--------------------------------------------------------------------------------------------------------------------------------------------------------------------------------------------------------------------------------------------------------------------------------|-------------------------------------------------------------------------------------------------------------------------------------------------------------------------------------------------------------------------------------------------------------------------------------------------------------------------------------------------|
| [45] | Salivary/stool IgA and stool/plasma cytokines, stool characteristics, blood lipid profile, DTH, differential white blood cell count, lymphocyte phenotype, and lymphocyte proliferation, plasma cytokines and LBP, <i>ex vivo</i> production of cytokines and NK cell activity | ↑ Total effector memory with WG vs. RG<br>↑ LPS-stimulated TNF- $\alpha$ production with WG vs. RG<br>↑ Stool weight and stool frequency with WG vs. RG                                                                                                                                                                                         |
| [46] | Flatulence, stool frequency, fecal pH, GI symptoms, intestinal permeability and breath H <sub>2</sub>                                                                                                                                                                          | ↑ Flatulence with WGW, WGR vs. RW<br>↓ Bloating with WGW, WGR vs. RW<br>↑ Stool frequency with WGR vs. RW at weeks 2 and weeks 4<br>↑ Soft and water content in stool with WGR vs. baseline                                                                                                                                                     |
| [42] | Salivary sIgA assessment, bowel habits and general mood                                                                                                                                                                                                                        | No changes in salivary sIgA levels, bowel habits and general mood with AXOS vs. pre-AXOS                                                                                                                                                                                                                                                        |
| [32] | Volatile organic compounds, immune parameters, TEAC, GI tolerance and stool characteristics                                                                                                                                                                                    | No changes in breath metabolites, immune markers, GI tolerance, stool characteristics and parameters of systemic oxidative stress with GOS vs. MD                                                                                                                                                                                               |
| [36] | Fecal water genotoxicity and cytotoxicity                                                                                                                                                                                                                                      | ↓ Fecal p-cresol and water cytotoxicity with WBE vs. pre-WBE<br>↓ Fecal p-cresol and water cytotoxicity with WBE, OF vs. PLA<br>Significant negative correlation between fecal output and cytotoxicity                                                                                                                                          |
| [30] | Safety, GI symptoms, body fat, anthropometric and biochemical assessments, metabolomics profiling of serum and urine, insulin secretion, liver function indices (ALT, AST, GGT), glucose metabolism and gut hormones                                                           | No gastrointestinal adverse events reported; safety of RS supplementation confirmed by clinical chemistry and metabolomics analyses<br>↓ Abdominal adiposity, LDL-cholesterol, UA and blood urea nitrogen with RS vs. CS<br>↑ Insulin, C-peptide and active GLP-1 at 30 min after the meal with RS vs. CS<br>↑ AUC for C-peptide with RS vs. CS |

<sup>d</sup> ALT: alanine aminotransferase; AST: aspartate aminotransferase; AUC: area under curve; BP: blood pressure; CRP: C-reactive protein; DTH: delayed-type hypersensitivity; FFA: free fatty acids; GGT:  $\gamma$ -glutamyl transferase; GI: gastrointestinal; GLP: glucagon-like peptide; HDL: HDL-cholesterol; HOMA: homeostasis assessment model; hs-CRP: high-sensitivity C-reactive protein; H<sub>2</sub>: hydrogen; iAUC: incremental area under curve; IgA: immunoglobulin A; ISI<sub>composite</sub>: insulin sensitivity index; LBP: LPS-binding protein; LDL: LDL-cholesterol; LPS: lipopolysaccharide; NEFA: non-esterified fatty acids; NK: natural killer; OCTT: oro-cecal transit time; OFTT: oro-fecal transit time; OXM: oxyntomodulin; PF: plasma ferritin; PGE<sub>2</sub>: prostaglandin E<sub>2</sub>; PYY: peptide YY; sIgA: secretory immunoglobulin A; TAG: triacylglycerol; tAUC: total areas under the curve; TC: fasting total cholesterol; TEAC: trolox equivalent antioxidant capacity; UA: uric acid; VLDL: very-low density lipoproteins; WGTT: whole-gut transit time

↑ : increase; ↓ : decrease
