# Supplementary material for: Effects of Dietary Fibers on Short-Chain Fatty Acids and Gut Microbiota Composition in Healthy Adults: A Systematic Review
Source: MDPI journal article supplement (doi:10.3390/nu14132559), 2022-06-21
Supplement: s1 [file s1]

**Table S2.** Daily fiber intake of participants during the DF interventions reported by studies included in the review.

| Reference           | Fiber content in the test product <sup>a</sup>                                                                                           | Total daily fiber intake<br>(intervention arm)<br>(g/day) | Fiber content in the<br>control/placebo product                                               | Total daily fiber intake<br>(control/placebo arm)<br>(g/day) |
|---------------------|------------------------------------------------------------------------------------------------------------------------------------------|-----------------------------------------------------------|-----------------------------------------------------------------------------------------------|--------------------------------------------------------------|
| [28] Alfa           | 30 g MSPrebiotic® RS (70% RS2; from test product)                                                                                        | N.D.                                                      | N.D.                                                                                          | N.D.                                                         |
| [43] Ampatzoglou    | N.D.                                                                                                                                     | 26 ± 1                                                    | N.D.                                                                                          | 16 ± 1                                                       |
| [11] Boler          | 21 g PDX (from 3 snack bars g/day)                                                                                                       | PDX: 14.8 (supplemental<br>fiber is not included)         | Control bar total fiber 0.9<br>%                                                              | 14.8                                                         |
|                     | 21 g SCF (from snack bars g/day)                                                                                                         | SCF: 14.4 (supplemental<br>fiber is not included)         |                                                                                               |                                                              |
| [31] Boll           | 8.9 g AXOS ww + 1.5 g<br>Glucans ww + 6.6 g RS ww (from a 140.5 g portion sizes<br>of the test products)                                 | N.D.                                                      | <0.15 g Glucans ww + 1.2<br>g RS ww (from a 116.2 g<br>portion sizes of the test<br>products) | N.D.                                                         |
|                     | 18.4 g AXOS ww + 3.1 g glucans ww + 1.0 g RS ww<br>(from a 141.4 g portion sizes of the test products)                                   |                                                           |                                                                                               |                                                              |
|                     | <0.15 g Glucans ww + 15 g RS ww (from a 137.9 g<br>portion sizes of the test products)                                                   |                                                           |                                                                                               |                                                              |
| [9] Brandl          | TRIAL 1<br>10 g extrinsic wheat fiber (from experimental solid<br>foods)                                                                 | TRIAL 1: 35.0 ± 6.0                                       | TRIAL 1: N.D.                                                                                 | TRIAL 1: 22.0 ± 7.0                                          |
|                     | TRIAL 2<br>10 g extrinsic wheat fiber (wheat plant fiber 3.75%,<br>psyllium 3.75%, guar 3.75%, from powder dissolved in<br>300 mL water) | TRIAL 2: 35.0 ± 10.0                                      | TRIAL 2: placebo<br>powdered cellulose<br>3.75%; psyllium 3.75%;<br>guar 3.75%                | TRIAL 2: 25.0 ± 10.0                                         |
| [47] Carvalho-Wells | 14.2 g total fiber (from a 48 g/day serving of product)                                                                                  | N.D.                                                      | 0.81 g total fiber (from a<br>48 g/day serving of<br>product)                                 | N.D.                                                         |

|                     |                                                                                                                                                                                                                                                                                                                                                   |                                                         |                                                                                                                 |              |
|---------------------|---------------------------------------------------------------------------------------------------------------------------------------------------------------------------------------------------------------------------------------------------------------------------------------------------------------------------------------------------|---------------------------------------------------------|-----------------------------------------------------------------------------------------------------------------|--------------|
| [24] Chen           | 15 g arabinogalactan<br>(from test product)                                                                                                                                                                                                                                                                                                       | 14.41 ± 6.10<br>(supplemental fiber is not<br>included) | N.D.                                                                                                            | 15.01 ± 7.24 |
| [15] Clarke         | 3×5 g/day β <sub>2</sub> -1 fructan<br>(50:50 mixture of IN and short-chain oligosaccharides;<br>from a test product)                                                                                                                                                                                                                             | N.D.                                                    | N.D.                                                                                                            | N.D.         |
| [48] Connolly       | ~ 2.8 g fiber and 1.3 g -glucan (from a 45 g/day serving<br>of product)                                                                                                                                                                                                                                                                           | 18.8 ± 0.9                                              | ~1.35 g fiber (from a 45<br>g/day serving of product)                                                           | 18.2 ± 1.1   |
| [16] Costabile 2010 | 10 g/day VLCI (inulin: 97.5 %; from a test product)                                                                                                                                                                                                                                                                                               | N.D.                                                    | N.D.                                                                                                            | N.D.         |
| [33] Costabile 2012 | 8 g/day PDX powder (from a test product)                                                                                                                                                                                                                                                                                                          | N.D.                                                    | N.D.                                                                                                            | N.D.         |
| [41] Damen          | 4.0% AX dm + 2.14 g AXOS + 9.2 % total fiber (from 180<br>g/day serving of product)                                                                                                                                                                                                                                                               | N.D.                                                    | 3.7% AX dm + 10.1 %<br>total fiber (from 180<br>g/day serving of product)                                       | N.D.         |
| [17] Darzi          | 25.5 g/day L-Rha (from test products)                                                                                                                                                                                                                                                                                                             | N.D.                                                    | N.D.                                                                                                            | N.D.         |
|                     | 22.4 g/day IN (from test products)                                                                                                                                                                                                                                                                                                                | N.D.                                                    |                                                                                                                 |              |
| [29] Deehan         | 65.0/58.2 dwb/as-is % total fiber (from test product of<br>maize RS4)                                                                                                                                                                                                                                                                             | N.D.                                                    | 0.0                                                                                                             | N.D.         |
|                     | 90.0/78.7 dwb/as-is % total fiber (from test product of<br>potato RS4)                                                                                                                                                                                                                                                                            |                                                         |                                                                                                                 |              |
|                     | 96.0/85.3 dwb/as-is % total fiber (from test product of<br>tapioca RS4)                                                                                                                                                                                                                                                                           |                                                         |                                                                                                                 |              |
| [18] Deroover       | 50 % fiber (from WB fraction – unmodified WB) + 10 g<br><sup>13</sup> C-inulin + 10 g inulin- <sup>14</sup> C-carboxylic acid (from a<br>standard breakfast)<br><br>50 % fiber (from 20 g wheat bran with a reduced particle<br>size) + 10 g <sup>13</sup> C-inulin + 10 g inulin- <sup>14</sup> C-carboxylic acid<br>(from a standard breakfast) | N.D.                                                    | 10 g <sup>13</sup> C-inulin + 10 g<br>inulin- <sup>14</sup> C-carboxylic acid<br>(from a standard<br>breakfast) | N.D.         |

|                |                                                                                                                                                                          |                         |                                        |            |
|----------------|--------------------------------------------------------------------------------------------------------------------------------------------------------------------------|-------------------------|----------------------------------------|------------|
|                | 71 % fiber (from 20 g de-starched pericarp-enriched wheat bran) + 10 g <sup>13</sup> C-inulin + 10 g inulin- <sup>14</sup> C-carboxylic acid (from a standard breakfast) |                         |                                        |            |
| [49] Duysburgh | 1.4 g β-glucans (from a 40 g/day serving of product)                                                                                                                     | N.D.                    | 0 (from a 40 g/day serving of product) | N.D.       |
|                | 5, 10 or 20 g/day 2'FL (from a test product)                                                                                                                             |                         |                                        |            |
| [39] Elison    | 5, 10 or 20 g/day LNNt (from a test product)                                                                                                                             | N.D.                    | N.D.                                   | N.D.       |
|                | 5, 10 or 20 g/day 2'FL+LNNt (2:1 mass ratio; from a test product)                                                                                                        |                         |                                        |            |
| [19] Fernandes | 24 g IN (from 300 ml drink)                                                                                                                                              | N.D.                    | N.D.                                   | N.D.       |
| [12] Fernando  | N.D. (expected to contain 3-5 g/day of oligosaccharides)                                                                                                                 | N.D.                    | N.D.                                   | N.D.       |
|                | 5 g/day of raffinose (from test products)                                                                                                                                |                         |                                        |            |
|                |                                                                                                                                                                          | 59.1 ± 5.6              |                                        |            |
| [40] Fechner   | 25 g/day lupin kernel fiber (from experimental foods)                                                                                                                    |                         | N.D.                                   | 34.4 ± 5.8 |
|                | 25 g/day citrus fiber (from experimental foods)                                                                                                                          | 57.8 ± 5.6              |                                        |            |
| [25] Finegold  | 175 mg XOS (from 1.4 g/day capsule supplements) for 8 weeks                                                                                                              | N.D.                    | N.D.                                   | N.D.       |
|                | 350 mg XOS (from 2.8 g/day capsule supplements)                                                                                                                          | N.D.                    |                                        |            |
| [37] François  | 2.4 g AXOS (from 140 ml soft drinks with WBE at 3 g/day)                                                                                                                 | N.D.                    | N.D.                                   | N.D.       |
|                | 8 g AXOS (from 140 ml soft drinks with WBE at 10 g/day)                                                                                                                  | N.D.                    |                                        |            |
| [20] Healey    | 16 g/day of powdered inulin-type fructan prebiotic (50:50 inulin to fructo-oligosaccharide mix)                                                                          | 28.2 ± 12.2             | N.D.                                   | 28 ± 11.9  |
| [21] Holscher  | 5.0 g agave IN (from 3 chews/day)                                                                                                                                        | 17.6 (without agave IN) | N.D.                                   | 18.2       |
|                | 7.5 g agave IN (from 3 chews/day)                                                                                                                                        | 18.0 (without agave IN) |                                        |            |

|                            |                                                                                             |                                                |                                                                  |            |
|----------------------------|---------------------------------------------------------------------------------------------|------------------------------------------------|------------------------------------------------------------------|------------|
| <b>[13] Hooda</b>          | 21 g PDX (from 3 snack bars/day)                                                            | PDX: 14.8 (supplemental fiber is not included) | Control bar total fiber<br>0.90%                                 | 14.8       |
|                            | 21 g of SCF (from 3 snack bars/day)                                                         | SFC: 14.4 (supplemental fiber is not included) |                                                                  |            |
| <b>[34] Lamichhane</b>     | 8 g/d PDX powder (from a test product)                                                      | N.D.                                           | N.D.                                                             | N.D.       |
| <b>[22] Lecerf</b>         | 5 g XOS (from 6.64 g/day of a XOS-enriched compound derived from wheat)                     | 12.1 ± 0.6 (without XOS)                       | N.D.                                                             | N.D.       |
|                            | 3 g IN + 1 g XOS (from 6.64 g/day of a mixture containing inulin-type fructans, XOS and MD) | N.D. (INU-XOS group)                           |                                                                  |            |
| <b>[27] Lefranc-Millot</b> | NUTRIOSE® (sugar-free, digestion-resistant dextrin) 10, 15 or 20 g/day                      | N.D.                                           | N.D.                                                             | N.D.       |
| <b>[38] Müller</b>         | 71% AXOS dm, 10–14% dm β-glucan (from a 5 g/day of AXOS powder)                             | 18.3 ± 6.9                                     | N.D.                                                             | 18.3 ± 9.4 |
| <b>[50] Nilsson</b>        | 20.2 g (9.5 RS + 10.7 DF; from 161.0 g/day serving of product)                              | N.D.                                           | 3.9 g (1.3 g RS + 2.6 g DF; from 116.7 g/day serving of product) | N.D.       |
|                            | 19.4 g (8.8 g RS + 10.6 g DF; from 190.2 g/day serving of product)                          |                                                |                                                                  |            |
|                            | 38.1 g (22.0 g RS + 16.1 g DF; from 213.0 g/day serving of product)                         |                                                |                                                                  |            |
|                            | 81.0 g (30.9 g RS + 50.1 g DF; from 388.2 g/day serving of product)                         |                                                |                                                                  |            |
|                            | 11.5 g (8.0 g RS + 3.5 g DF; from 130 g/day serving of product)                             |                                                |                                                                  |            |
|                            | 19.1 g (8.8 g RS + 10.3 g DF; from 181.8 g/day serving of product)                          |                                                |                                                                  |            |

|               |                                                                 |                                                 |                                                   |                                            |
|---------------|-----------------------------------------------------------------|-------------------------------------------------|---------------------------------------------------|--------------------------------------------|
|               | 9.9 g (4.7 g RS + 5.2 g DF; from 80.5 g/day serving of product) |                                                 |                                                   |                                            |
| [23] Petry    | ~20 g/day IN (from test products)                               | N.D.                                            | N.D.                                              | N.D.                                       |
|               | TRIAL 1: 9 ± 7 g (from 40 g/day serving of product)             | N.D.                                            | TRIAL 1: 0 ± 0 (from 37 g/day serving of product) | N.D.                                       |
| [10] Reimer   | TRIAL 2: 5 ± 3 g (from 25 g/day serving of product)             | N.D.                                            | TRIAL 2: 1 ± 0 (from 28 g/day serving of product) | N.D.                                       |
|               |                                                                 | Females: 30 ± 2                                 |                                                   | Females: 18 ± 1                            |
| [44] Ross     | N.D.                                                            | Males: 34 ± 3.6                                 | N.D.                                              | Males: 20 ± 1.6                            |
| [14] Slavin   | 20 g chicory IN (from low-fat vanilla ice cream)                | N.D.                                            | N.D.                                              | N.D.                                       |
| [35] Sloan    | 14 g/day OF                                                     | 19.7 ± 5.8 (supplemental fiber is not included) | N.D.                                              | 19.6 ± 7.6                                 |
|               | 3.3 g β-glucan (oat BG)                                         | 23.2 ± 2.7                                      |                                                   |                                            |
| [26] Trimigno | 3.3 g β-glucan (barley BG)                                      | 28.7 ± 4.2                                      | Non-fiber control                                 | 26.6 ± 2.8                                 |
|               | 3.3 g β-glucan (barley mutant BG)                               | 24.2 ± 2.4                                      |                                                   |                                            |
| [45] Vanegas  | N.D.                                                            | 40 ± 5 during follow-up (week 3 to week 8)      | N.D.                                              | 21 ± 3 during follow-up (week 3 to week 8) |
|               | <u>WGR diet</u>                                                 |                                                 | <u>RW diet</u>                                    |                                            |
|               | 12.4 g/100 g of DF of rye flakes                                |                                                 | 3.7 g/100 g DF of puffed wheat                    |                                            |
|               | 10.6 g/100 g of DF of rye bun (light)                           | <u>WGR diet</u>                                 | 5.1 g/100 g DF of Sandwich bread                  |                                            |
|               | 11.7 g/100 g of DF of rye bun (dark)                            | 34.9 ± 11.9                                     | 4.0 g/100 gDF of rustic rolls                     | 22.9 ± 9.2                                 |
|               | 8.3 g/100 g of DF of rye WG pasta                               |                                                 | 3.0 g/100 g DF of refined pasta                   |                                            |
| [46] Vuholm   | 12.5 g/100 g of DF of rye kernels                               | <u>WGW diet</u>                                 | 5.7 g/100 g DF of pearled spelt kernels           |                                            |
|               | 12.0 g/100 g of DF of WG crisp bread                            | 31.1 ± 10.9                                     |                                                   |                                            |
|               | Amount of study products consumed (g/day): 217±20.2             |                                                 |                                                   |                                            |
|               | <u>WGW diet</u>                                                 |                                                 |                                                   |                                            |
|               | 9.5 g/100 g of DF of wheat flakes                               |                                                 |                                                   |                                            |
|               | 8.0 g/100 g of DF of wheat bun (light)                          |                                                 |                                                   |                                            |

|                    |                                                                                                                                                                                                                      |                                              |                                                                                      |              |
|--------------------|----------------------------------------------------------------------------------------------------------------------------------------------------------------------------------------------------------------------|----------------------------------------------|--------------------------------------------------------------------------------------|--------------|
|                    | 10.1 g/100 g of DF of wheat bun (dark)<br>8.3 g/100 g of DF of wheat WG pasta<br>9.6 g/100 g of DF of WG wheat kernels<br>7.9 g/100 g of DF of WG crisp bread<br>Amount of study products consumed (g/day): 239±21.2 |                                              | 4.8 g/100 g DF of crisp bread<br>Amount of study products consumed (g/day): 221±22.9 |              |
| <b>[42] Walton</b> | 2.0% AX dm + 2.2 g AXOS/day (from a 180 g/day serving of product)                                                                                                                                                    | 18.9 ± 5.7                                   | control AX content 0.6% dm<br>placebo 0.9% dm<br>4.2% total AX                       | 19.8 ± 7.9   |
| <b>[32] Wilms</b>  | 15.0 g/day of pure GOS (from 21.6 g/day of Biotis™ GOS)                                                                                                                                                              | 19.5 ± 6.6 (supplemental fiber not included) | N.D.                                                                                 | 19.4 ± 7.2   |
| <b>[36] Windey</b> | 83.4 % of dm of AXOS (from 15 g/day and 30 g/day of test product 1)<br>or<br>69 % of OF (from 15 g/day and 30 g/day of test product 2)                                                                               | N.D.                                         | N.D.                                                                                 | N.D.         |
| <b>[30] Zhang</b>  | 40 g/day high-amylose RS2                                                                                                                                                                                            | 54.99 ± 6.62                                 | N.D.                                                                                 | 10.04 ± 0.57 |

<sup>a</sup> Interventions: as-is: adjusted for moisture content; AX: arabinoxylan; AXOS: arabinoxylan-oligosaccharides; BG: β-glucans; DF: dietary fiber; dm: dry matter; dwb: dry weight basis; IN: inulin; LNnT: lacto-N-neotetraose; L-Rha: L-rhamnose; N.D.: no data; OF: oligofructose; PDX: polydextrose; RS: resistant starch; RS2: resistant starch type 2; RS4: resistant starch type 4; RW: refined wheat; SCF: soluble corn fiber; VLCI: very-long-chain inulin; WB: wheat bran; WBE: wheat bran extract; WGR: wholegrain rye; WGW: wholegrain wheat; ww: wet weight; XOS: xylo-oligosaccharide; 2'FL: 2'-O-fucosyllactose
