# Supplementary material for: Effects of Dietary Fibers on Short-Chain Fatty Acids and Gut Microbiota Composition in Healthy Adults: A Systematic Review
Source: Nutrients. 2022 Jun 21;14(13):2559. doi: 10.3390/nu14132559 (PMC9268559; doi:10.3390/nu14132559)
Supplement: Supplementary file 1 [file nutrients-14-02559-s001.zip]

Archive with 4 entries (4 files):
- Suppl_Figures S1and S2.pdf
- Suppl_Table S1.pdf
- Suppl_Table S2.pdf
- Suppl_Table S3.pdf
